# Supplementary material
Source: PubMed Central journal article supplement (PMC3025614)
Supplement: NIHMS247027-supplement-1_si_002.pdf [file NIHMS247027-supplement-1_si_002.pdf]

# Supporting Information

for

## Differential Reactivity Between Two Copper Sites in Peptidylglycine $\alpha$ -Hydroxylating Monooxygenase (PHM)

Eduardo E. Chufán<sup>1</sup>, Sean T. Prigge<sup>2</sup>, Xavier Siebert<sup>1</sup>, Betty A. Eipper<sup>3</sup>, Richard E. Mains<sup>3</sup>,  
L. Mario Amzel<sup>1,\*</sup>

<sup>1</sup>Department of Biophysics and Biophysical Chemistry, Johns Hopkins School of Medicine,

<sup>2</sup>Molecular Microbiology and Immunology, Johns Hopkins Bloomberg School of Public Health,  
Johns Hopkins University, Baltimore, Maryland 21205, USA and

<sup>3</sup>Department of Neuroscience, University of Connecticut Health Center, Farmington,  
Connecticut 06030, USA

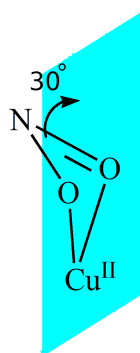

**Figure S1.** Angular orientation of the  $\text{Cu}_M\text{-O}_2\text{N}$  moiety of the nitrite-soaked PHMcc crystal.

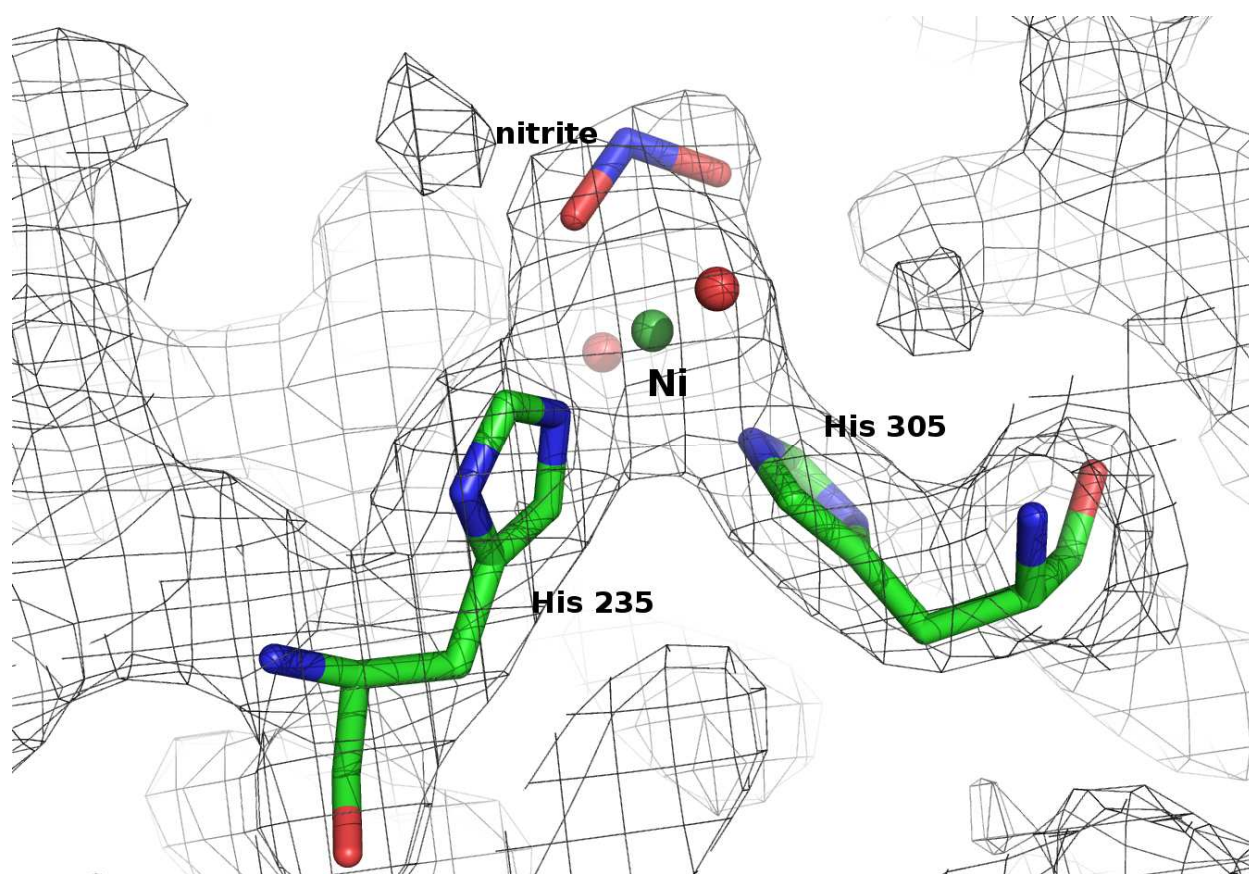

**Figure S2.** The structure of the Ni crystal contact of a nitrite-soaked PHMcc. Ni<sup>II</sup> ion is found in an octahedral environment with nitrite bound to the metal in an asymmetric bidentate fashion (Ni-O<sub>nitrite</sub> = 1.95 and 2.65 Å). A grey mesh represents 2Fo-Fc electron density contoured at 1.0  $\sigma$ . Carbons (green), nitrogens (blue), oxygens (red), nickel (green ball) and water molecules (red balls) are colored as indicated.

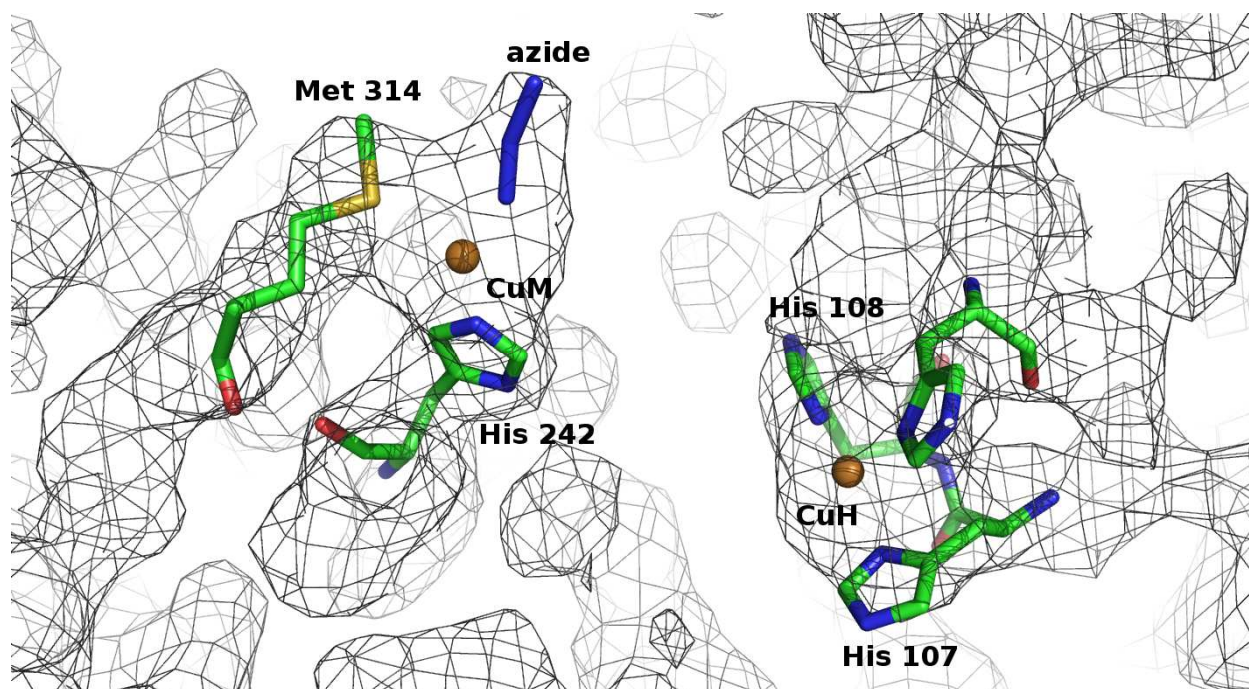

**Figure S3.** The structure of  $Cu_M$  and  $Cu_H$  sites of an azide-soaked PHMcc. Soaking conditions: 100 mM  $NaN_3$  for 1.5 hours. The azide is shown bound to  $Cu_M$  at 1.8 Å. The  $Cu_M$  ligand His 244 is not shown in the figure for clarity. A gray mesh represents 2Fo-Fc electron density contoured at 1.0  $\sigma$ . Carbons are colored green, nitrogens blue, oxygens red, sulphur yellow and copper gold.

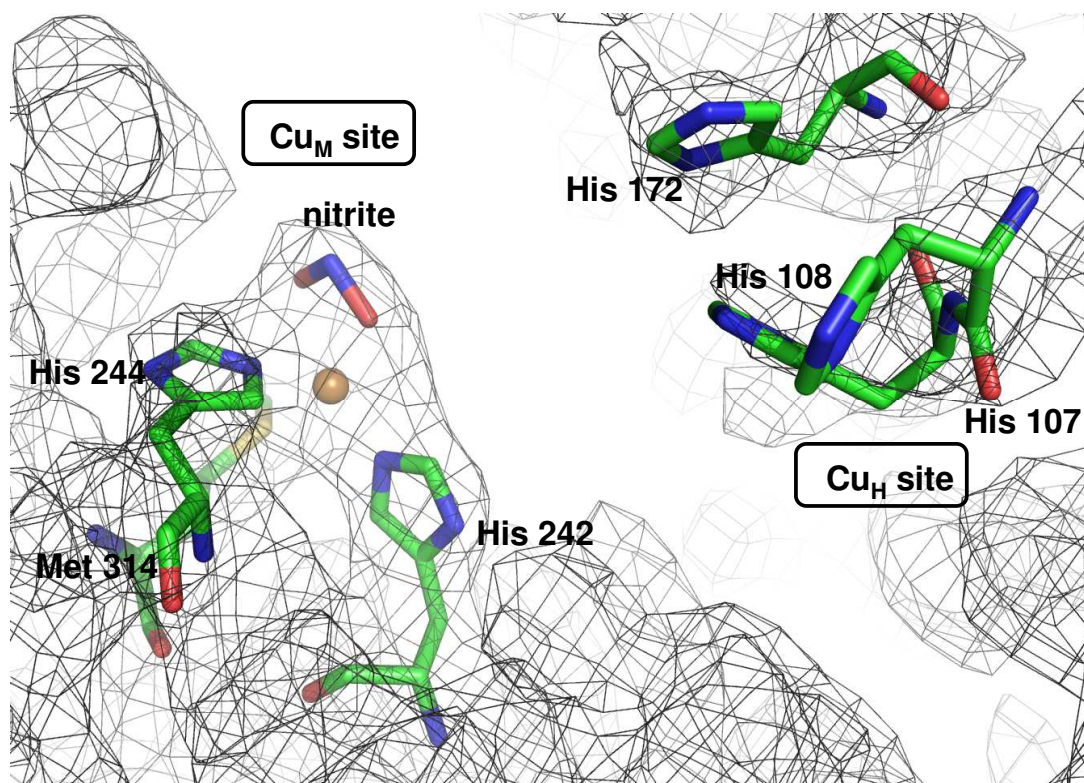

**Figure S4.** The structure of the  $Cu_M$  site of a reduced nitrite-soaked PHMcc. The nitrite is shown bound to  $Cu_M$  while the  $Cu_H$  has been completely removed by effect of the high concentration of nitrite. A gray mesh represents  $2F_o - F_c$  electron density contoured at  $1.0 \sigma$ . Carbons are colored grey, nitrogens blue, oxygens red, sulphur yellow and copper green.



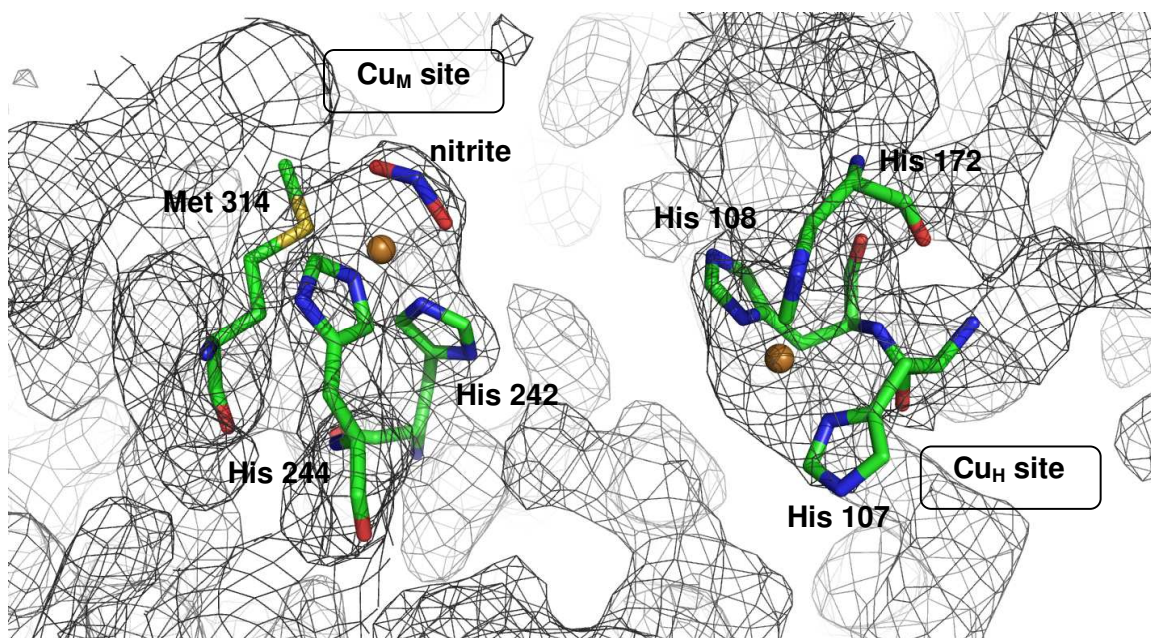

**Figure S5.** The structure of  $Cu_M$  and  $Cu_H$  sites of a nitrite-soaked PHMcc in the presence of substrate. The nitrite is shown bound to  $Cu_M$  as a bidentate ligand. A gray mesh represents  $2F_o - F_c$  electron density contoured at  $1.0 \sigma$ . Carbons are colored green, nitrogens blue, oxygens red, sulfur yellow and copper gold.
